# Supplementary material for: Do Patients with Benign Paroxysmal Positional Vertigo Have a Higher Prevalence of Osteoporosis? A Systematic Review and Meta-Analysis
Source: MDPI journal article supplement (doi:10.3390/jpm14030303), 2024-03-13
Supplement: s1 [file s1]

**Supplement S1.** The literature search algorithm and the results from relevant clinical studies.

**PubMed (17, April, 2023)**

|    | <b>Search Queries</b>                            | <b>Articles #</b> |
|----|--------------------------------------------------|-------------------|
| #1 | osteoporosis[MeSH Terms]                         | 62,371            |
| #2 | osteopenia[Title/Abstract]                       | 10,975            |
| #3 | metabolic bone disease[MeSH Terms]               | 84,883            |
| #4 | bone density[MeSH Terms]                         | 60,326            |
| #5 | #1 OR #2 OR #3 OR #4                             | 122,651           |
| #6 | Benign Paroxysmal Positional Vertigo[MeSH Terms] | 1,223             |
| #7 | BPPV[Title/Abstract]                             | 1,895             |
| #8 | #6 OR #7                                         | 2,217             |
| #9 | #5 AND #8                                        | 50                |

**Embase (17, April, 2023)**

|    | <b>Search Queries</b>                          | <b>Articles #</b> |
|----|------------------------------------------------|-------------------|
| #1 | osteoporosis:ti,ab,kw                          | 131,774           |
| #2 | osteopenia:ti,ab,kw                            | 19,000            |
| #3 | metabolic bone diseas*:ti,ab,kw                | 4,700             |
| #4 | bone density:ti,ab,kw                          | 118,642           |
| #5 | #1 OR #2 OR #3 OR #4                           | 213,931           |
| #6 | Benign Paroxysmal Positional Vertigo':ti,ab,kw | 2,931             |
| #7 | BPPV':ti,ab,kw                                 | 2,347             |
| #8 | #6 OR #7                                       | 3,274             |
| #9 | #5 AND #8                                      | 93                |

**Cochrane Library (17, April, 2023)**

|    | <b>Search Queries</b> | <b>Articles #</b> |
|----|-----------------------|-------------------|
| #1 | osteoporosis:ti,ab,kw | 11,804            |

|    |                                                |        |
|----|------------------------------------------------|--------|
| #2 | osteopenia:ti,ab,kw                            | 1,365  |
| #3 | metabolic bone diseas*':ti,ab,kw               | 1,020  |
| #4 | bone density:ti,ab,kw                          | 14,355 |
| #5 | #1 OR #2 OR #3 OR #4                           | 20,444 |
| #6 | Benign Paroxysmal Positional Vertigo':ti,ab,kw | 416    |
| #7 | BPPV':ti,ab,kw                                 | 291    |
| #8 | #6 OR #7                                       | 443    |
| #9 | #5 AND #8                                      | 6      |
